# Supplementary material for: Electromagnetic wave absorption properties of a carbon nanotube modified by a tetrapyridinoporphyrazine interface layer
Source: Royal Society of Chemistry journal article supplement (doi:10.1039/c7tc02701j), 2017-01-01
Supplement: c7tc02701j1.pdf [file c7tc02701j1.pdf]

## Supporting Information

### Electromagnetic Wave Absorption Properties of Carbon Nanotube Modified by Tetrapyrrolineporphyrazine Interface Layer

Luo Kong<sup>1</sup>, Chen Wang<sup>1</sup>, Xiaowei Yin<sup>2\*</sup>, Xiaomeng Fan<sup>2</sup>,

Wei Wang<sup>3</sup>, Jianfeng Huang<sup>1#</sup>

1 School of Materials Science and Engineering, Shaanxi University of Science and  
Technology, Xi'an, Shaanxi, 710021, China

2 Science and Technology on Thermostructural Composite Materials Laboratory,  
Northwestern Polytechnical University, Xi'an, Shaanxi 710072, China

3 Systems Engineering Institute of Sichuan Aerospace, Chengdu, Sichuan, 610100,  
China

---

\*Corresponding author: Tel.: +86 29 88494947, E-mail addresses: yinxw@nwpu.edu.cn  
(Xiaowei Yin)

#Corresponding author: Tel.: +86 29 86168802, E-mail addresses:  
huangjf@sust.edu.cn (Jianfeng Huang)

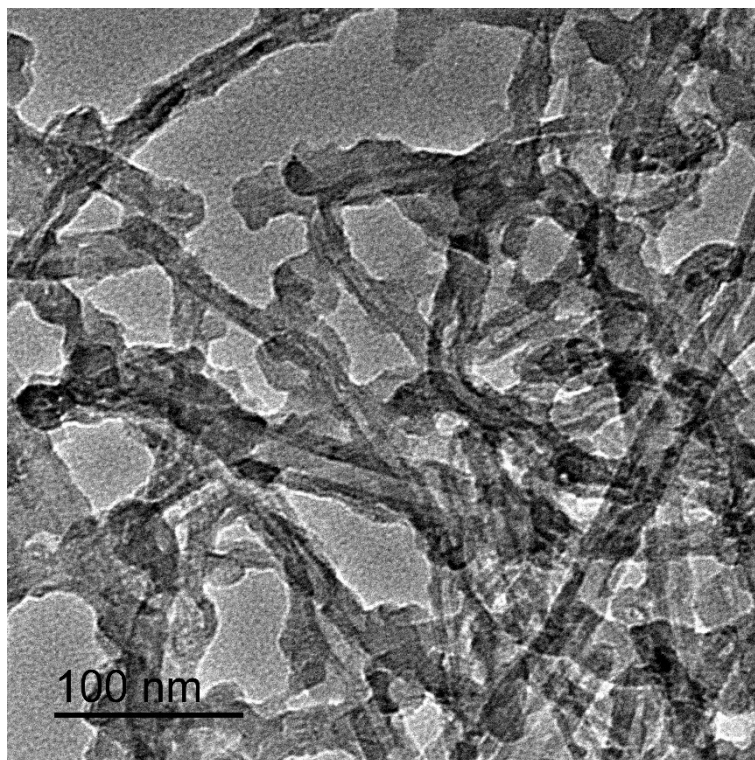

Figure S1 TEM image of CoTAP-CNTs, the CNT content is 40wt%

Figure S1 is the morphology of CoTAP-CNTs, the CNT content is 40wt%. Because the CNT content is too much, the CoTAP content decreases accordingly, and the surface of CNTs can't be coated completely by CoTAP.

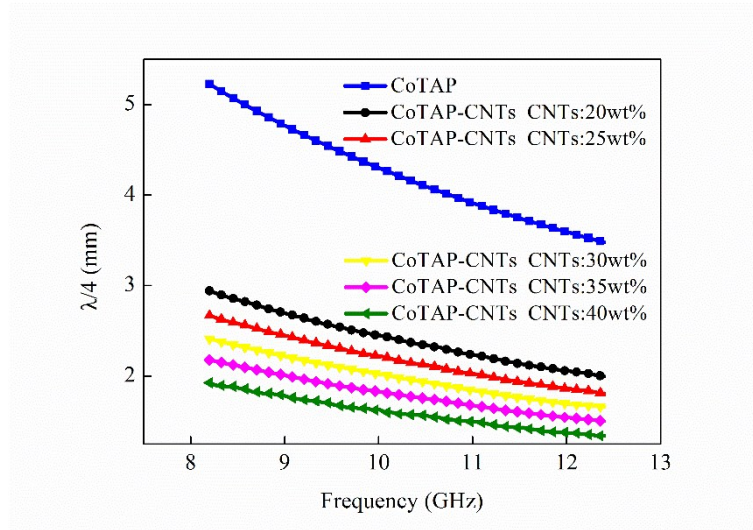

Figure S2 the quarter-wavelength for the hybrids with different CNT contents

The minimum reflection of the EM energy or the matching condition occurs when the thickness of the absorber sample,  $d$ , is approximately a quarter of the propagating wavelength multiplied by an odd number, i.e.  $d=n\lambda/4$  ( $n=1, 3, 5, 7, 9, \dots$ ), and the cancellation of the reflected waves from upper and bottom surfaces at the air-material interface occurs. Therefore, a maximum absorbing peak corresponding to the minimum RC of the EM wave appears. Figure S2 illustrates the quarter-wavelength in X-band for the hybrids with different CNT contents.
